# Supplementary material for: Reliability of parental assessment of auditory skills in young children: a cross-sectional study in Italian language
Source: HighWire-hosted journal article supplement (doi:10.1136/bmjopen-2020-042297), 2021-06-01
Supplement: bmjopen-2020-042297supp002_data_supplement.pdf [file bmjopen-2020-042297supp002_data_supplement.pdf]

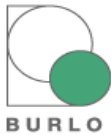

IRCCS BURLO GAROFOLO – TRIESTE  
Dipartimento di Pediatria  
S.C. Audiologia e Otorinolaringoiatria

Programma di screening uditivo neonatale  
e sorveglianza audiologica  
Regione Friuli Venezia Giulia

## QUESTIONNAIRE ON HEARING AND COMMUNICATION ABILITIES (QUAC)

Name and surname: \_\_\_\_\_

Date of birth: \_\_\_\_\_

Date of compilation: \_\_\_\_\_

Compiled by: \_\_\_\_\_

The questionnaire explores auditory and communicative skills in your child before 36 months of age. It is not a hearing test and there are no correct or wrong answers. The questionnaire can serve as supporting information for audiological exams or as a tool for following normal development. The statements about the child's behavior regard the ability to hear various linguistic and non-linguistic sounds, and the ability to understand the meaning. Other statements concern child's communicative behavior in everyday situations when you interact with the child or when the child is in a noisy environment. There are also some statements that concern child's production.

For each statement, we ask you to put a cross on:

- 1 when the described behavior occurs never or almost never;
- 2 when the described behavior occurs sometimes, but not constantly;
- 3 when the described behavior occurs often or always.

You will often find examples along with the statements, but if anything remain unclear, you can always ask for clarification.

| Months                                             | How many times 1 | How many times 2 | How many times 3 | A   | I      | C                | P  | Total   | Unclear cases |
|----------------------------------------------------|------------------|------------------|------------------|-----|--------|------------------|----|---------|---------------|
| 0-1                                                | /2               | /2               | /2               | /6  | 0      | 0                | 0  | /6      |               |
| 2-3                                                | /6               | /6               | /6               | /12 | /3     | 0                | /3 | /18     |               |
| 4-6                                                | /6               | /6               | /6               | /12 | /3     | 0                | /3 | /18     |               |
| 7-9                                                | /8               | /8               | /8               | /12 | /6     | /3               | /3 | /24     |               |
| 10-12                                              | /9               | /9               | /9               | /12 | /3     | /6               | /6 | /27     |               |
| 13-15                                              | /9               | /9               | /9               | /12 | /3     | /6               | /6 | /27     |               |
| 16-21                                              | /9               | /9               | /9               | /12 | /3     | /6               | /6 | /27     |               |
| 22-24                                              | /10              | /10              | /10              | /12 | /3     | /6               | /9 | /30     |               |
| 25-30                                              | /10              | /10              | /10              | /12 | /3     | /6               | /9 | /30     |               |
| 31-36                                              | /11              | /11              | /11              | /12 | /3     | /12              | /6 | /33     |               |
| Does the child hear well according to the parents? |                  |                  |                  |     | NO [ ] | I DON'T KNOW [ ] |    | YES [ ] |               |

**1 = NEVER****2 = SOMETIMES****3 = OFTEN / ALWAYS****A 0-1 MONTHS** The child:

|                                             |                                                                                                                                                 |    |              |     |
|---------------------------------------------|-------------------------------------------------------------------------------------------------------------------------------------------------|----|--------------|-----|
| 1.a                                         | Wakes up, cries, is startled, holds still, in response to sudden loud noises (e.g. door slamming, dog barking, an object falling on the floor). | 1  | 2            | 3   |
| 2.a                                         | Stops or speeds up suckling when hearing an environmental noise.                                                                                | 1  | 2            | 3   |
| According to you, does the child hear well? |                                                                                                                                                 | NO | I DON'T KNOW | YES |

**A 2-3 MONTHS** The child:

|                                             |                                                                                                                                                 |    |              |     |
|---------------------------------------------|-------------------------------------------------------------------------------------------------------------------------------------------------|----|--------------|-----|
| 1.a                                         | Wakes up, cries, is startled, holds still, in response to sudden loud noises (e.g. door slamming, dog barking, an object falling on the floor). | 1  | 2            | 3   |
| 2.a                                         | Stops or speeds up suckling when hearing an environmental noise.                                                                                | 1  | 2            | 3   |
| 3.a                                         | Listens to a lullaby and is calmed down by it.                                                                                                  | 1  | 2            | 3   |
| 4.a                                         | Is calmed down by mother's voice even if not seeing her.                                                                                        | 1  | 2            | 3   |
| 5.i                                         | Is interested in faces and smiles when someone interacts with him/her.                                                                          | 1  | 2            | 3   |
| 6.p                                         | Produces sounds other than crying.                                                                                                              | 1  | 2            | 3   |
| According to you, does the child hear well? |                                                                                                                                                 | NO | I DON'T KNOW | YES |

**A 4-6 MONTHS** The child:

|                                             |                                                                                                                                                 |    |              |     |
|---------------------------------------------|-------------------------------------------------------------------------------------------------------------------------------------------------|----|--------------|-----|
| 1.a                                         | Wakes up, cries, is startled, holds still, in response to sudden loud noises (e.g. door slamming, dog barking, an object falling on the floor). | 1  | 2            | 3   |
| 2.a                                         | Moves slightly the eyes or the head towards a sound or a voice if coming from right or left.                                                    | 1  | 2            | 3   |
| 3.a                                         | Likes when hearing music, lullabies, or sound-toys.                                                                                             | 1  | 2            | 3   |
| 4.a                                         | Turns the look towards the one who talks or stops crying when hearing mother calling his/her name even if not seeing her.                       | 1  | 2            | 3   |
| 5.i                                         | Smiles and/or produces sounds when you play with him/her by changing the voice and facial expressions.                                          | 1  | 2            | 3   |
| 6.p                                         | Produces sounds that start to sound like syllables ("bwaaa", "mwwaaa").                                                                         | 1  | 2            | 3   |
| According to you, does the child hear well? |                                                                                                                                                 | NO | I DON'T KNOW | YES |

**A 7-9 MONTHS** The child:

|                                             |                                                                                                                                                                                                |    |              |     |
|---------------------------------------------|------------------------------------------------------------------------------------------------------------------------------------------------------------------------------------------------|----|--------------|-----|
| 1.a                                         | Turns towards the sound source and catches it with the eyes.                                                                                                                                   | 1  | 2            | 3   |
| 2.a                                         | Easily localizes noises coming from aside and downwards (e.g. when cutlery falls on the floor, when there is noise from the dishes in the kitchen, or when someone squeezes a plastic bottle). | 1  | 2            | 3   |
| 3.a                                         | Pays attention to music and enjoys listening.                                                                                                                                                  | 1  | 2            | 3   |
| 4.a                                         | Turns when called with his/her name from a distance.                                                                                                                                           | 1  | 2            | 3   |
| 5.i                                         | Shows interest and likes it when you talk to him/her or sing a song.                                                                                                                           | 1  | 2            | 3   |
| 6.i                                         | Uses his/her voice or gesticulates to communicate with you (e.g. indexing with a finger to something that draws his/her attention or to ask for something).                                    | 1  | 2            | 3   |
| 7.c                                         | Understands the meaning of certain common words (e.g. mom, dad, eat, hi, etc.).                                                                                                                | 1  | 2            | 3   |
| 8.p                                         | Produces sequences of sounds compound by the vowels and consonants (e.g. pa, ta, ma, tatata, papapa).                                                                                          | 1  | 2            | 3   |
| According to you, does the child hear well? |                                                                                                                                                                                                | NO | I DON'T KNOW | YES |

**A 10-12 MONTHS** The child:

|                                             |                                                                                                                                             |    |              |     |
|---------------------------------------------|---------------------------------------------------------------------------------------------------------------------------------------------|----|--------------|-----|
| 1.a                                         | Is attracted or fascinated and turns towards new sounds (e.g. bell).                                                                        | 1  | 2            | 3   |
| 2.a                                         | Immediately localizes sounds or noises coming from a side or downwards, even if weak. (e.g. clapping hands, a toy that falls on the floor). | 1  | 2            | 3   |
| 3.a                                         | Moves rhythmically/dances when hearing the music.                                                                                           | 1  | 2            | 3   |
| 4.a                                         | Knows if mom or dad are talking even if not seeing them.                                                                                    | 1  | 2            | 3   |
| 5.i                                         | Indicates with a finger to communicate. (e.g. indexing with a finger to something that draws his/her attention or to ask for something).    | 1  | 2            | 3   |
| 6.c                                         | Turns or reacts when called by name (smiles, looks up).                                                                                     | 1  | 2            | 3   |
| 7.c                                         | Understands the meaning of some words from everyday life (names of the family members and toys, sounds of animals).                         | 1  | 2            | 3   |
| 8.p                                         | Imitates sounds that you produce while playing with him/her.                                                                                | 1  | 2            | 3   |
| 9.p                                         | Produces various sequences of vowels and consonants (e.g. tatata, papapa, pataga) or says few words (e.g. mama, papa).                      | 1  | 2            | 3   |
| According to you, does the child hear well? |                                                                                                                                             | NO | I DON'T KNOW | YES |

**A 13-15 MONTHS** The child:

|                                             |                                                                                                                                            |    |              |     |
|---------------------------------------------|--------------------------------------------------------------------------------------------------------------------------------------------|----|--------------|-----|
| 1.a                                         | Is attracted by sounds and noises in the house even if they come from another room (e.g. bell, kitchen sounds).                            | 1  | 2            | 3   |
| 2.a                                         | Localizes sounds or noises coming from a side or below, and also those coming from above (airplane sound, noises from the upstairs, etc.). | 1  | 2            | 3   |
| 3.a                                         | Moves rhythmically/dances when hearing the music.                                                                                          | 1  | 2            | 3   |
| 4.a                                         | Turns when someone calls him his/her name or talks to him/her.                                                                             | 1  | 2            | 3   |
| 5.i                                         | Looks in the face when talked to and starts to respect communication turns (listens when talked to and "talks" when you stop).             | 1  | 2            | 3   |
| 6.c                                         | Indicates or localizes a familiar object when you ask where is it.                                                                         | 1  | 2            | 3   |
| 7.c                                         | Understands simple phrases (e.g. "Would you like to drink?") and simple orders (e.g. "Bring the ball!").                                   | 1  | 2            | 3   |
| 8.p                                         | Repeats the words or some of the words that he/she hears (e.g. you say "Lets put on the shoes now", and he/she repeats "Shoes").           | 1  | 2            | 3   |
| 9.p                                         | Spontaneously says words (e.g. mom, papa, tata, no, etc.).                                                                                 | 1  | 2            | 3   |
| According to you, does the child hear well? |                                                                                                                                            | NO | I DON'T KNOW | YES |

**A 16-21 MONTHS** The child:

|                                             |                                                                                                                                                                                    |    |              |     |
|---------------------------------------------|------------------------------------------------------------------------------------------------------------------------------------------------------------------------------------|----|--------------|-----|
| 1.a                                         | Seems to notice when the sounds starts or finishes (e.g. when the volume of the radio/TV/CD-player is turned down or up).                                                          | 1  | 2            | 3   |
| 2.a                                         | Localizes a sound or a noise, even if weak, coming from a side, above or below (e.g. noises from the upstairs, when cutlery falls on the floor, sound of phone from another room). | 1  | 2            | 3   |
| 3.a                                         | Moves rhythmically/dances when hearing the music.                                                                                                                                  | 1  | 2            | 3   |
| 4.a                                         | Follows your voice when you talk to him/her even when you move around.                                                                                                             | 1  | 2            | 3   |
| 5.i                                         | He/she listens to you when you talk and respects communication turns.                                                                                                              | 1  | 2            | 3   |
| 6.c                                         | Understands questions that begin with "where" and "who".                                                                                                                           | 1  | 2            | 3   |
| 7.c                                         | Understands simple (verbal only) instructions (e.g. "Bring the ball!"; "Take your shoes.").                                                                                        | 1  | 2            | 3   |
| 8.p                                         | Repeats the words or some of the words that he/she hears (e.g. you say "Lets put on the shoes now", and he/she repeats "Shoes").                                                   | 1  | 2            | 3   |
| 9.p                                         | Says new words every week.                                                                                                                                                         | 1  | 2            | 3   |
| According to you, does the child hear well? |                                                                                                                                                                                    | NO | I DON'T KNOW | YES |

**A 22-24 MONTHS** The child:

|                                             |                                                                                                                                  |    |              |     |
|---------------------------------------------|----------------------------------------------------------------------------------------------------------------------------------|----|--------------|-----|
| 1.a                                         | Answers when called from another room.                                                                                           | 1  | 2            | 3   |
| 2.a                                         | Easily localizes the sound, even mild, from every location (i.e. from a side, above or below).                                   | 1  | 2            | 3   |
| 3.a                                         | Identifies common environmental sounds and tells to you what he/she hears. (e.g. washing machine, dishes, vacuum cleaner, etc.). | 1  | 2            | 3   |
| 4.a                                         | Enjoys listening to sounds and music in the radio, TV, computer.                                                                 | 1  | 2            | 3   |
| 5.i                                         | He/she likes to listen to stories and/or asks you to tell him/her simple stories.                                                | 1  | 2            | 3   |
| 6.c                                         | Understands questions that require yes-no answer (e.g. "Would you like some water?"; "Have you put your shoes?").                | 1  | 2            | 3   |
| 7.c                                         | Understands instructions that require two actions (e.g. "Bring the ball and put it inside the box.").                            | 1  | 2            | 3   |
| 8.p                                         | He/she uses many different words when talking.                                                                                   | 1  | 2            | 3   |
| 9.p                                         | Combines two or more words and attempts to form a sentence (e.g. mamma pappa, tata bua).                                         | 1  | 2            | 3   |
| 10.p                                        | Unknown persons understand around half of the words produced by the child.                                                       | 1  | 2            | 3   |
| According to you, does the child hear well? |                                                                                                                                  | NO | I DON'T KNOW | YES |

**A 25-30 MONTHS** The child:

|                                             |                                                                                                                                      |    |              |     |
|---------------------------------------------|--------------------------------------------------------------------------------------------------------------------------------------|----|--------------|-----|
| 1.a                                         | Upon hearing a new/interesting sound, he/she runs to see what happened or asks about it. Even if the sounds comes from another room. | 1  | 2            | 3   |
| 2.a                                         | Easily localizes the sound, even mild, from every location (i.e. from a side, above or below).                                       | 1  | 2            | 3   |
| 3.a                                         | Shows interest in listening to music or songs from radio, computer, CD.                                                              | 1  | 2            | 3   |
| 4.a                                         | Shows interest in listening someone talking on the phone.                                                                            | 1  | 2            | 3   |
| 5.i                                         | Shows interest in listening simple stories, read or told.                                                                            | 1  | 2            | 3   |
| 6.c                                         | Understands simple questions and/or instructions (e.g. "Where's the dog?"; "Put on your shoes.").                                    | 1  | 2            | 3   |
| 7.c                                         | Understands questions that contain multiple information (e.g. "Show me the little pink ball.").                                      | 1  | 2            | 3   |
| 8.p                                         | If he/she knows the word for it, he/she says it when requested (e.g. when you ask "What is this?").                                  | 1  | 2            | 3   |
| 9.p                                         | Combines two or more words and attempts to form a sentence.                                                                          | 1  | 2            | 3   |
| 10.p                                        | Generates questions when talking (e.g. "What are you doing?"; "What's this?"; "And then?").                                          | 1  | 2            | 3   |
| According to you, does the child hear well? |                                                                                                                                      | NO | I DON'T KNOW | YES |

**A 31-36 MONTHS** The child:

|                                             |                                                                                                                                |    |              |     |
|---------------------------------------------|--------------------------------------------------------------------------------------------------------------------------------|----|--------------|-----|
| 1.a                                         | Pays attention to verbal warnings indicating danger (e.g. when you say "Stop!" or "Watch out!").                               | 1  | 2            | 3   |
| 2.a                                         | Easily localizes the sound, even mild, from every location (i.e. from a side, above or below).                                 | 1  | 2            | 3   |
| 3.a                                         | Listens to songs, stories, nursery rhymes that he/she hears on CDs, radio, TV.                                                 | 1  | 2            | 3   |
| 4.a                                         | Listens when someone is talking on the phone and talks to him/her.                                                             | 1  | 2            | 3   |
| 5.i                                         | If elicited, he/she talks to you about the activities during that day.                                                         | 1  | 2            | 3   |
| 6.c                                         | Understands the meaning of inside, outside, above and under.                                                                   | 1  | 2            | 3   |
| 7.c                                         | Understands instructions that require two or more actions (e.g. "Bring the sweater, put in in the bag and put on the shoes."). | 1  | 2            | 3   |
| 8.c                                         | Understands questions that begin with "where", "who", "what", and "when".                                                      | 1  | 2            | 3   |
| 9.c                                         | Understands the meaning of simple stories that you tell based on an illustrated book.                                          | 1  | 2            | 3   |
| 10.p                                        | Produces the sentences with more than two words and starts to use words "later", "but", "why".                                 | 1  | 2            | 3   |
| 11.p                                        | Unknown persons understand almost all words produced by the child.                                                             | 1  | 2            | 3   |
| According to you, does the child hear well? |                                                                                                                                | NO | I DON'T KNOW | YES |
